# Supplementary material
Source: publisher figshare collection journal article supplement (https://acs.figshare.com/ndownloader/files/3625698)
Supplement: Supplementary file 1 [file 3625698]

Supporting Information for:

**Mechanistic aspects of deNO<sub>x</sub> processing over  
TiO<sub>2</sub> supported Co-Mn oxide catalysts:  
structure-activity relationships and *in situ*  
DRIFTS analysis**

*Hang Hu,<sup>†</sup> Sixiang Cai,<sup>†</sup> Hongrui Li,<sup>†</sup> Lei Huang,<sup>†</sup> Liyi Shi,<sup>†,‡</sup> and Dengsong Zhang<sup>\*,†</sup>*

<sup>†</sup>Research Center of Nano Science and Technology, Shanghai University, Shanghai 200444,  
China.

<sup>‡</sup>Department of Chemistry, Shanghai University, Shanghai 200444, China

**\*Corresponding author.** Fax: +86-21-66137152; Tel: +86-21-66136079;

E-mail: dszhang@shu.edu.cn

**Catalyst Preparation.** The Co/TiO<sub>2</sub> catalyst with the same Co content in Co(3)-Mn/TiO<sub>2</sub> was prepared by a conventional impregnation method. Anatase TiO<sub>2</sub> and precursor salt Co(CH<sub>3</sub>COO)<sub>2</sub> 4H<sub>2</sub>O were purchased from Sinopharm Chemical Reagent Company and used without further purification. In a typical synthesis, 20 mL of the aqueous precursor solution of Co(CH<sub>3</sub>COO)<sub>2</sub> was added into a 50 mL beaker containing 2.0 g TiO<sub>2</sub>. The mixture was stirred for 3 h, dried at 80 °C for 18 h and then calcined at 500 °C for 2 h to get the Co/TiO<sub>2</sub> catalyst.

**Table S1. Specific Surface Area and Pore Volume of Co/TiO<sub>2</sub> Catalyst**

| catalyst            | surface area (m <sup>2</sup> g <sup>-1</sup> ) | pore volume (cm <sup>3</sup> g <sup>-1</sup> ) |
|---------------------|------------------------------------------------|------------------------------------------------|
| Co/TiO <sub>2</sub> | 47.1                                           | 0.20                                           |

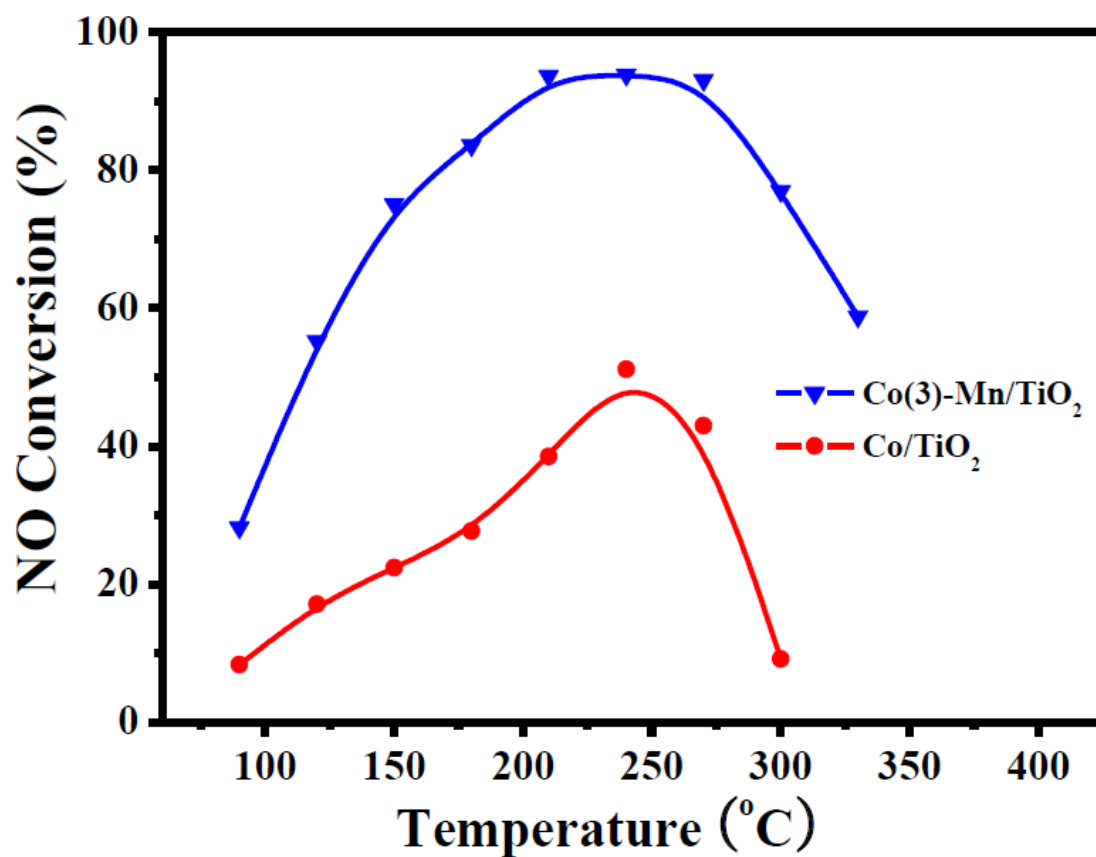

**Figure S1.** NO<sub>x</sub> conversion during the NH<sub>3</sub>-SCR reaction over Co(3)-Mn/TiO<sub>2</sub> and Co/TiO<sub>2</sub> catalysts. Reaction conditions: 500 ppm NO, 500 ppm NH<sub>3</sub>, 5 vol% O<sub>2</sub>, N<sub>2</sub> as balance gas, total flow rate 270 mL/min and GHSV= 40 000 h<sup>-1</sup>.

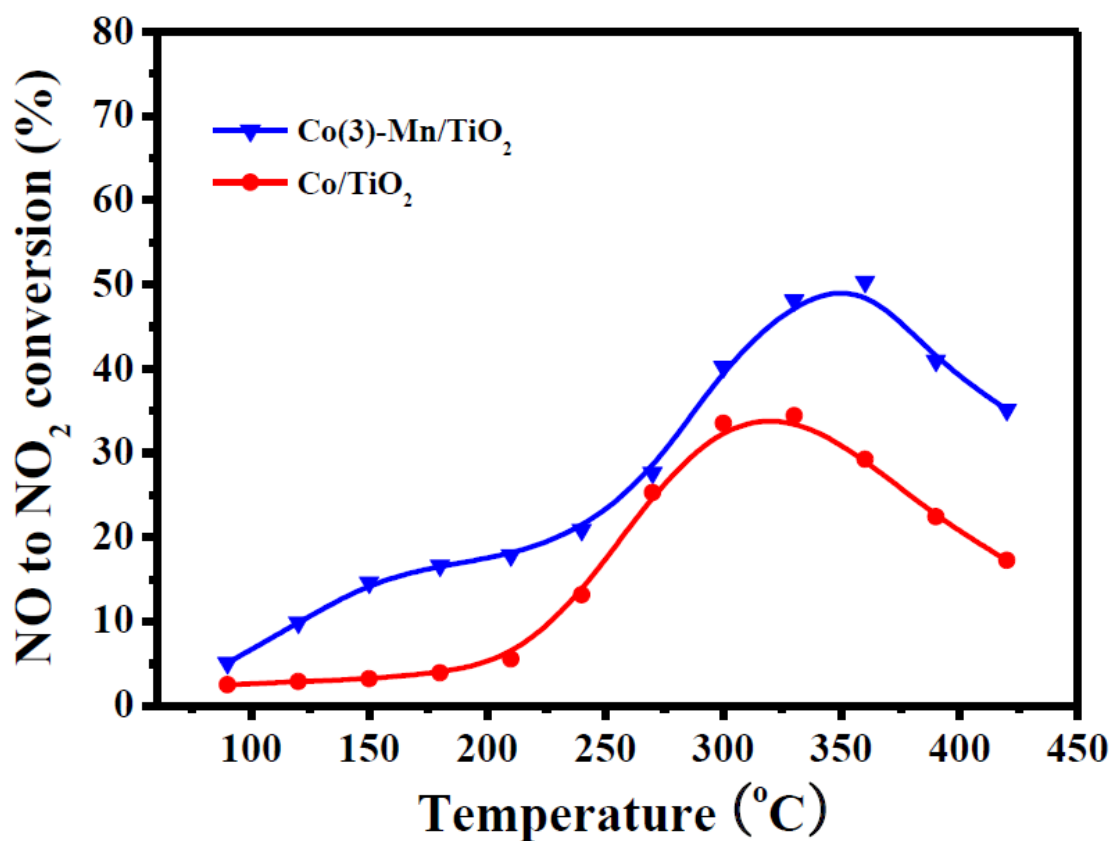

**Figure S2.** NO to NO<sub>2</sub> conversion during the NO oxidation reaction over Co(3)-Mn/TiO<sub>2</sub> and Co/TiO<sub>2</sub> catalysts. Reaction conditions: 500 ppm NO, 5 vol% O<sub>2</sub>, N<sub>2</sub> as balance gas, total flow rate 270 mL/min and GHSV= 40 000 h<sup>-1</sup>.

It can be seen that Co/TiO<sub>2</sub> catalyst hardly exhibits NO oxidation ability in low-temperature range, which is corresponding to the poor low-temperature catalytic activity.

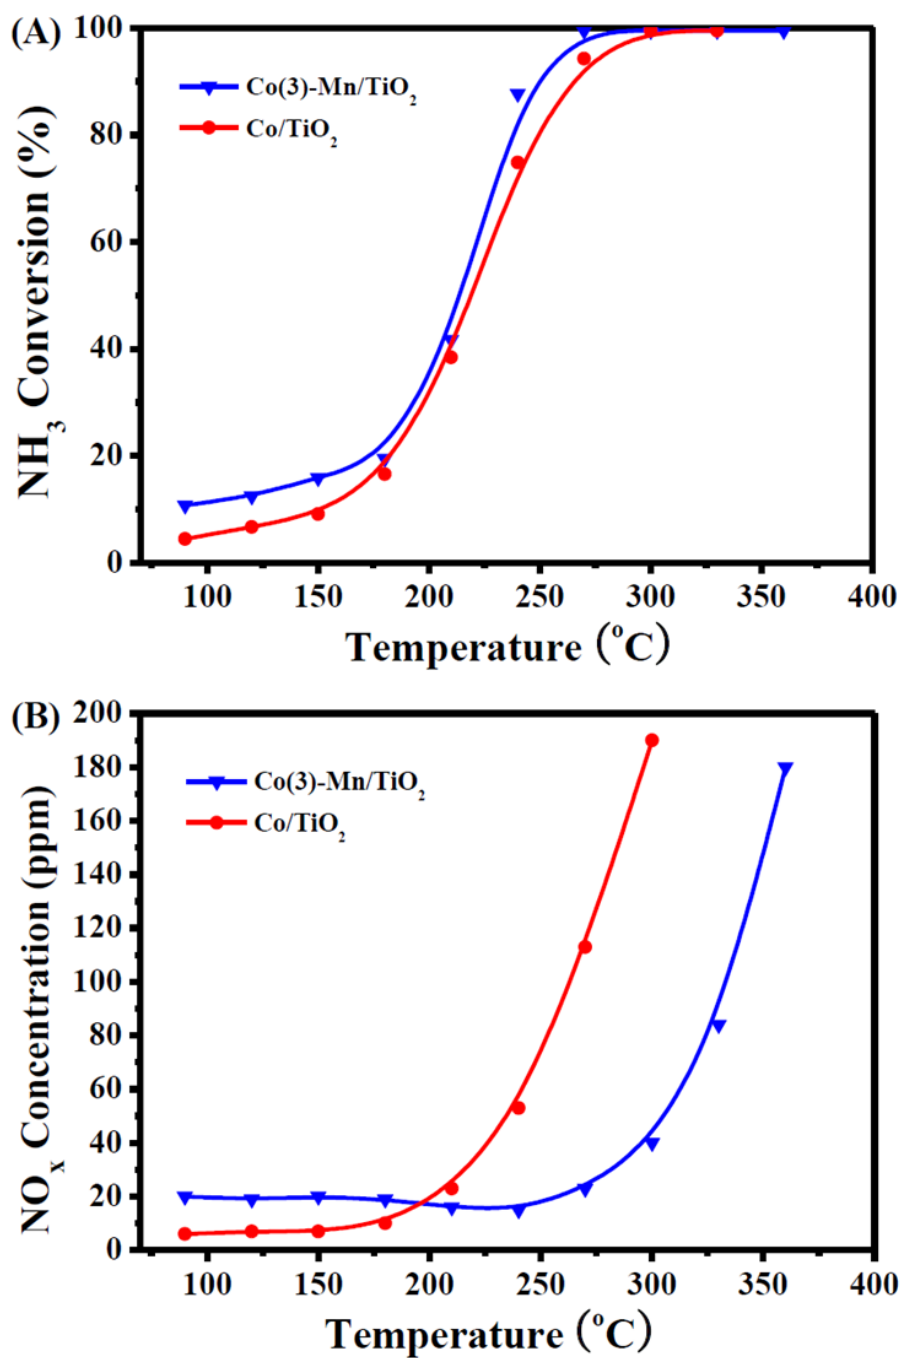

**Figure S3.** (A) NH<sub>3</sub> conversion and (B) NO<sub>x</sub> concentration during the NH<sub>3</sub> oxidation reaction over Co(3)-Mn/TiO<sub>2</sub> and Co/TiO<sub>2</sub> catalysts. Reaction conditions: 500 ppm NH<sub>3</sub>, 5 vol% O<sub>2</sub>, N<sub>2</sub> as balance gas, total flow rate 270 mL/min and GHSV= 40 000 h<sup>-1</sup>.

The NH<sub>3</sub> oxidation ability of Co/TiO<sub>2</sub> is about the same to that of Co(3)-Mn/TiO<sub>2</sub>, but the unselective NH<sub>3</sub> oxidation ability is much stronger (Figure S3B).

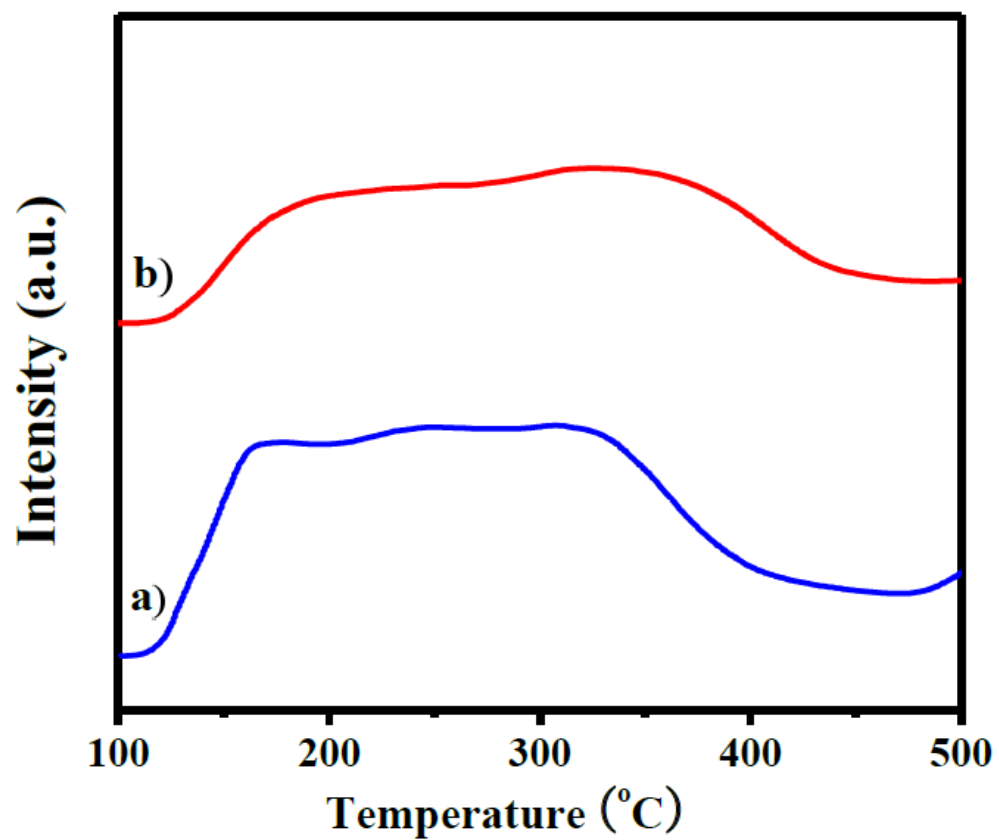

**Figure S4.** NH<sub>3</sub>-TPD profiles of the catalysts: (a) Co(3)-Mn/TiO<sub>2</sub> and (b) Co/TiO<sub>2</sub>.

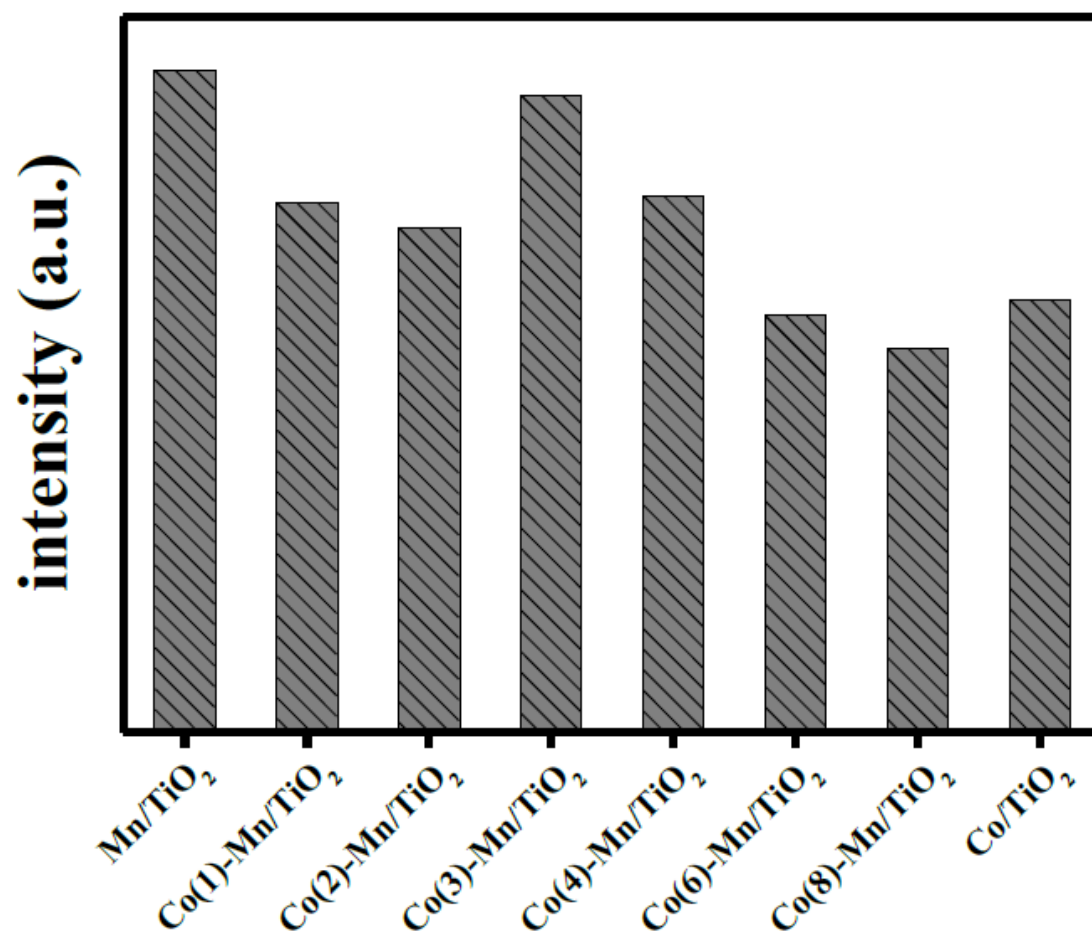

**Figure S5.** Relative amount of the surface acid sites based on NH<sub>3</sub>-TPD results.

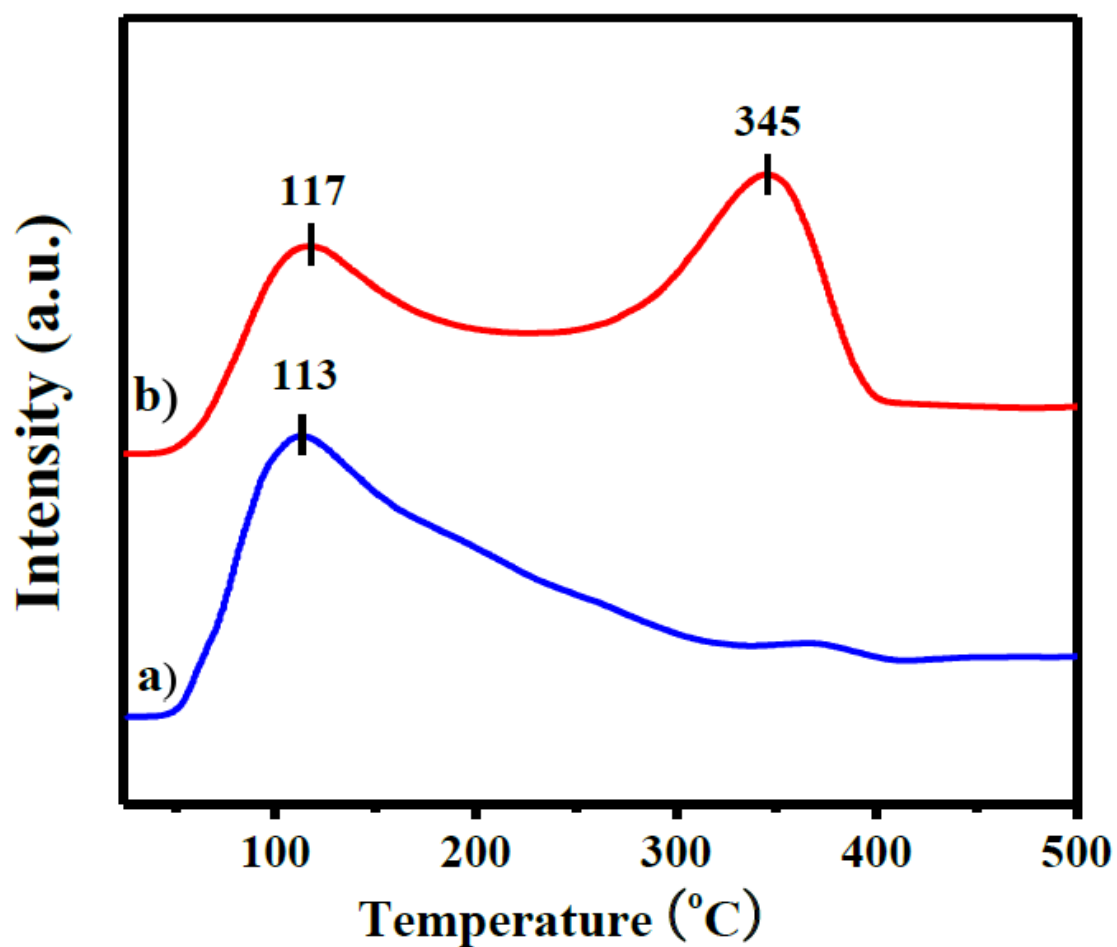

**Figure S6.** NO<sub>x</sub>-TPD profiles of the catalysts: (a) Co(3)-Mn/TiO<sub>2</sub> and (b) Co/TiO<sub>2</sub>.

The NO<sub>x</sub>-TPD result of Co/TiO<sub>2</sub> shows an obvious peak at 345 °C which confirmed that TiO<sub>2</sub> supported single component (Mn or Co) catalyst is not beneficial for the chemisorption of NO<sub>x</sub> species. The interaction between Mn and Co could greatly lower the activation energy of chemisorption.



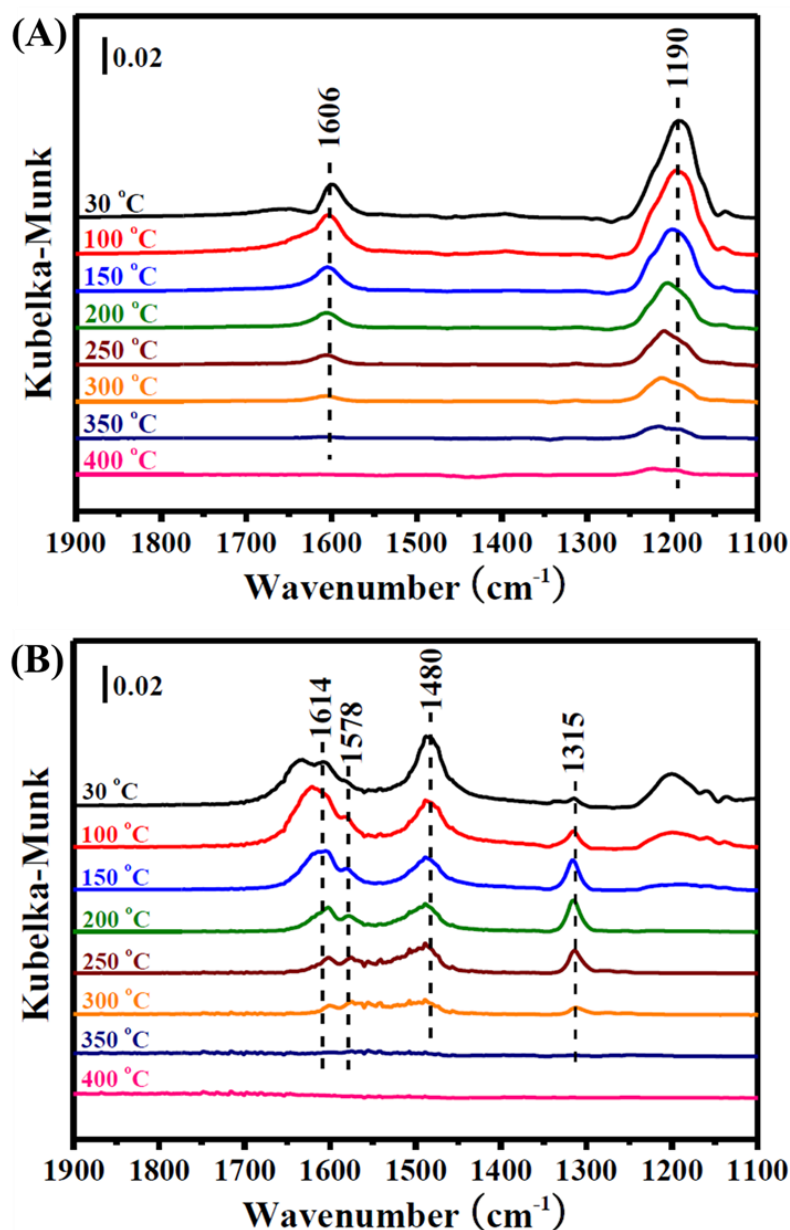

**Figure S7.** (A) *In situ* DRIFT spectra of NH<sub>3</sub> desorption on Co/TiO<sub>2</sub> as a function of temperature after the catalysts were exposed to a flow of 500 ppm NH<sub>3</sub> for 60 min. (B) *In situ* DRIFT spectra of NO<sub>x</sub> desorption on Co/TiO<sub>2</sub> as a function of temperature after the catalysts were exposed to a flow of 500 ppm NO + 5% O<sub>2</sub> for 60 min.

The surface adsorption species of NH<sub>3</sub> and NO<sub>x</sub> over Co/TiO<sub>2</sub> is similar to that over Mn/TiO<sub>2</sub> and Co-Mn/TiO<sub>2</sub> catalysts. The broad peaks centered at 1606 and 1190 cm<sup>-1</sup> in Figure S7A can be assigned to the asymmetric and symmetric bending vibrations of NH<sub>3</sub> coordinated with Lewis acid sites. The bands at 1614, 1578, 1480 and 1315 cm<sup>-1</sup> in Figure S7B can be assigned to the asymmetric stretching vibration of gaseous NO<sub>2</sub>, one of the split  $\nu_3$  vibrations of bidentate nitrates, the  $\nu_3$  stretch vibration of linear nitrites and the  $\nu_3$  stretch vibration of monodentate nitrites, respectively.

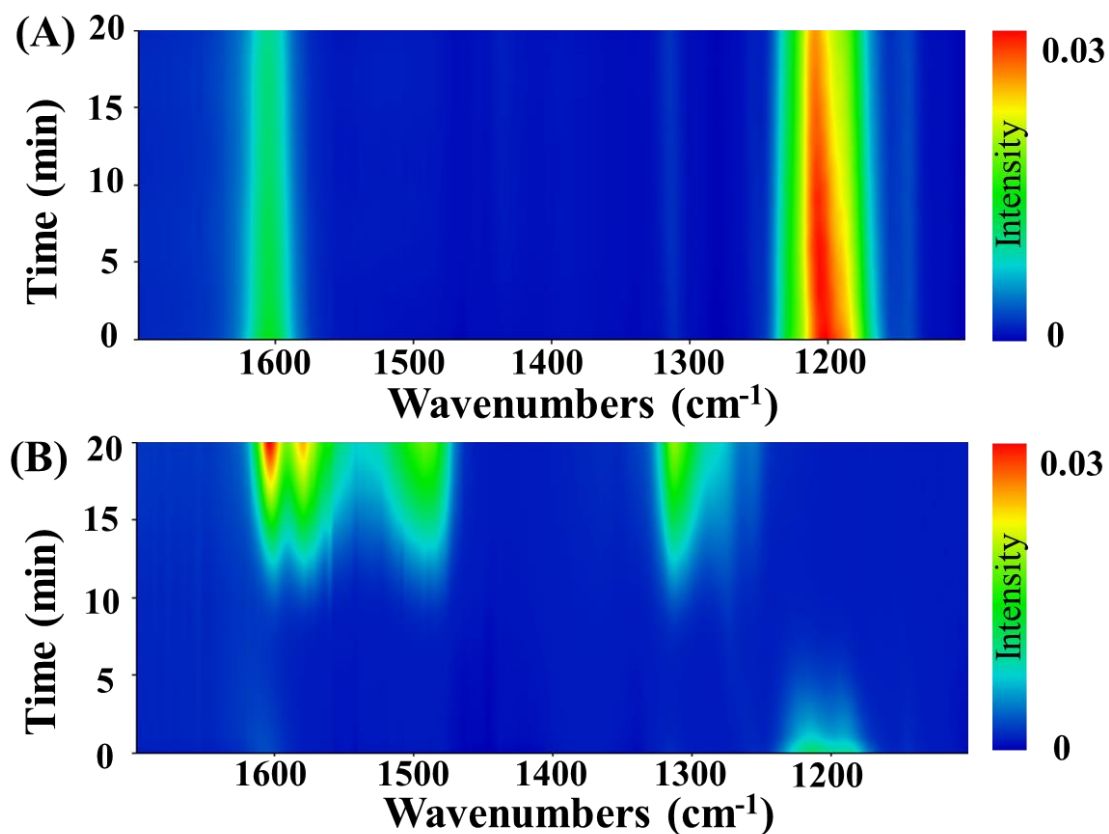

**Figure S8.** *In situ* DRIFT spectra of the transient reactions at (A) 150 °C and (B) 270 °C between NO+O<sub>2</sub> and preadsorbed NH<sub>3</sub> species over the Co/TiO<sub>2</sub> catalyst recorded as a function of time.

According to the results, the adsorbed NH<sub>3</sub> species can be hardly consumed by a continuous introduction of NO+O<sub>2</sub> at 150 °C, which is consistent with the catalytic performance. While at 270 °C, the NH<sub>3</sub> species showed an obvious decrease which consists of a considerable amount of desorption.

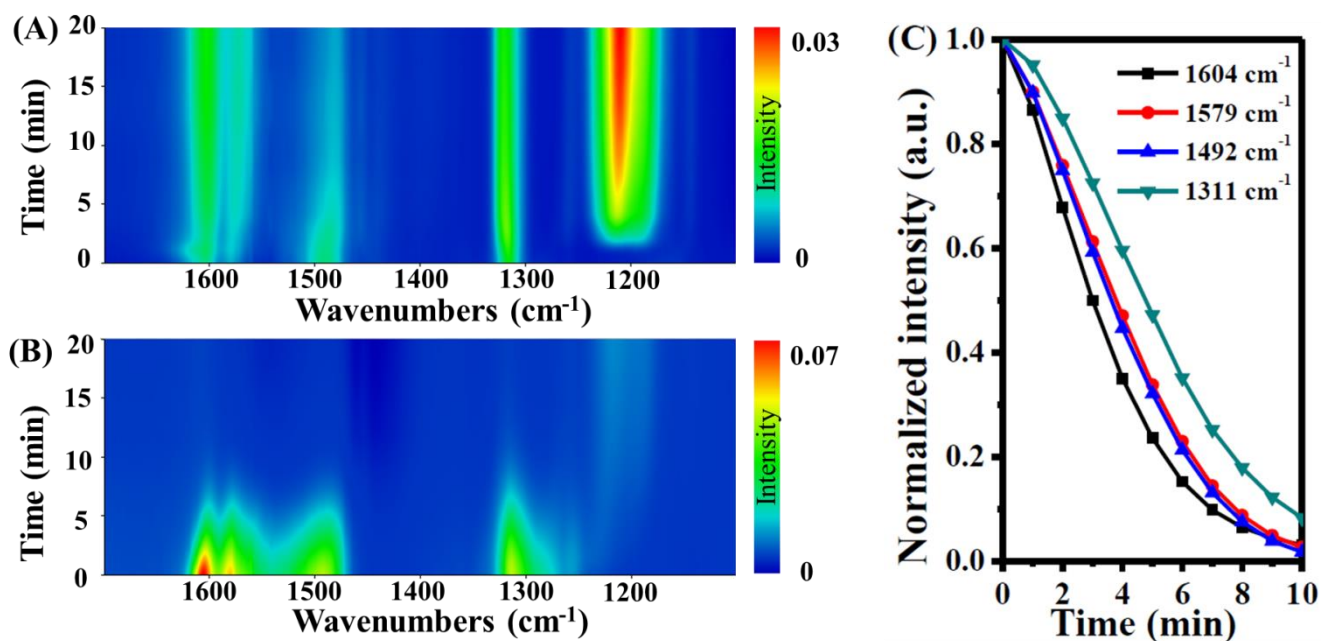

**Figure S9.** *In situ* DRIFT spectra of the transient reactions at (A) 150 °C and (B) 270 °C between NH<sub>3</sub> and preadsorbed NO+O<sub>2</sub> species over the Co/TiO<sub>2</sub> catalyst recorded as a function of time. (C) Consumption of different NO<sub>x</sub> species at 270 °C upon passing NH<sub>3</sub> over NO+O<sub>2</sub>-preadsorbed Co/TiO<sub>2</sub> catalyst.

The adsorption of NO+O<sub>2</sub> also leads to the formation of four NO<sub>x</sub> species: gaseous NO<sub>2</sub> (1604 cm<sup>-1</sup>), bidentate nitrates (1579 cm<sup>-1</sup>), linear nitrites (1498 cm<sup>-1</sup>) and monodentate nitrites (1311 cm<sup>-1</sup>). The NO<sub>x</sub> species remain stable on the catalyst surface at 150 °C which indicates no reaction occurred. When the transient reaction took place at 270 °C, the NO<sub>x</sub> species showed an obvious decrease in which the desorption cannot be overlooked.

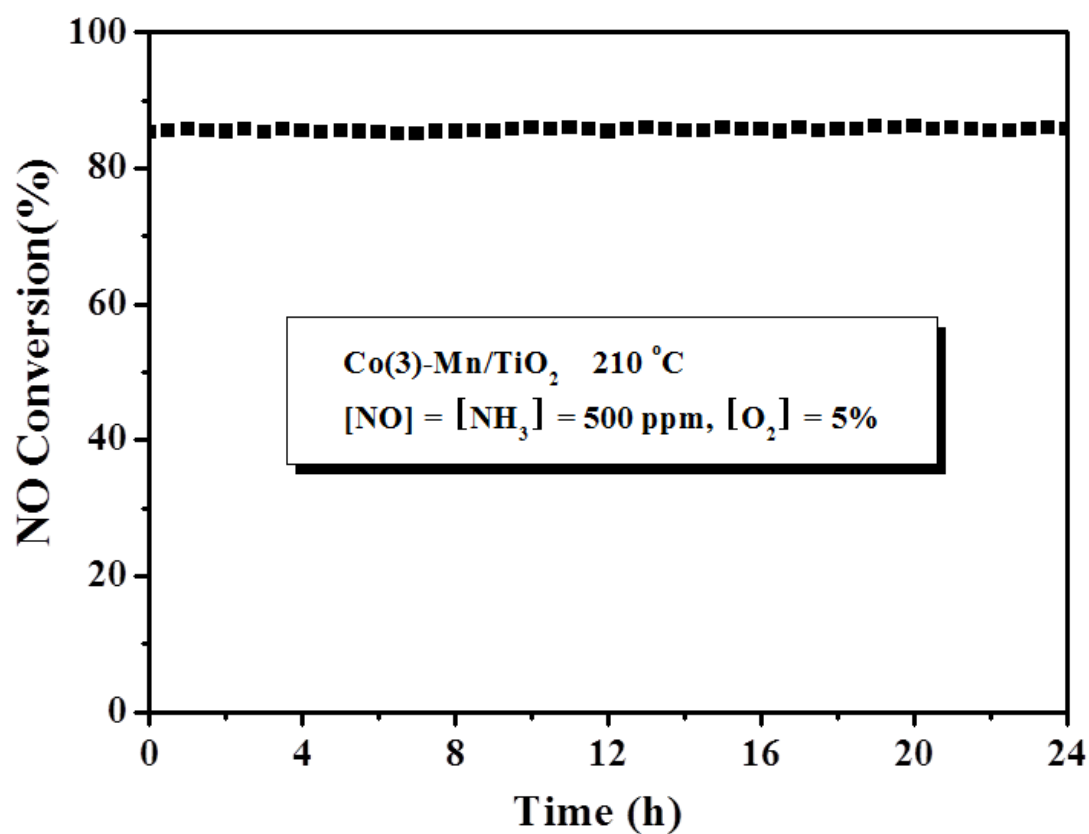

**Figure S10.** Stability test of the Co(3)-Mn/TiO<sub>2</sub> catalyst at 210 °C. Reaction conditions: 500 ppm NO, 500 ppm NH<sub>3</sub>, 5 vol% O<sub>2</sub>, N<sub>2</sub> as balance gas, total flow rate 270 mL/min and GHSV= 40 000 h<sup>-1</sup>.

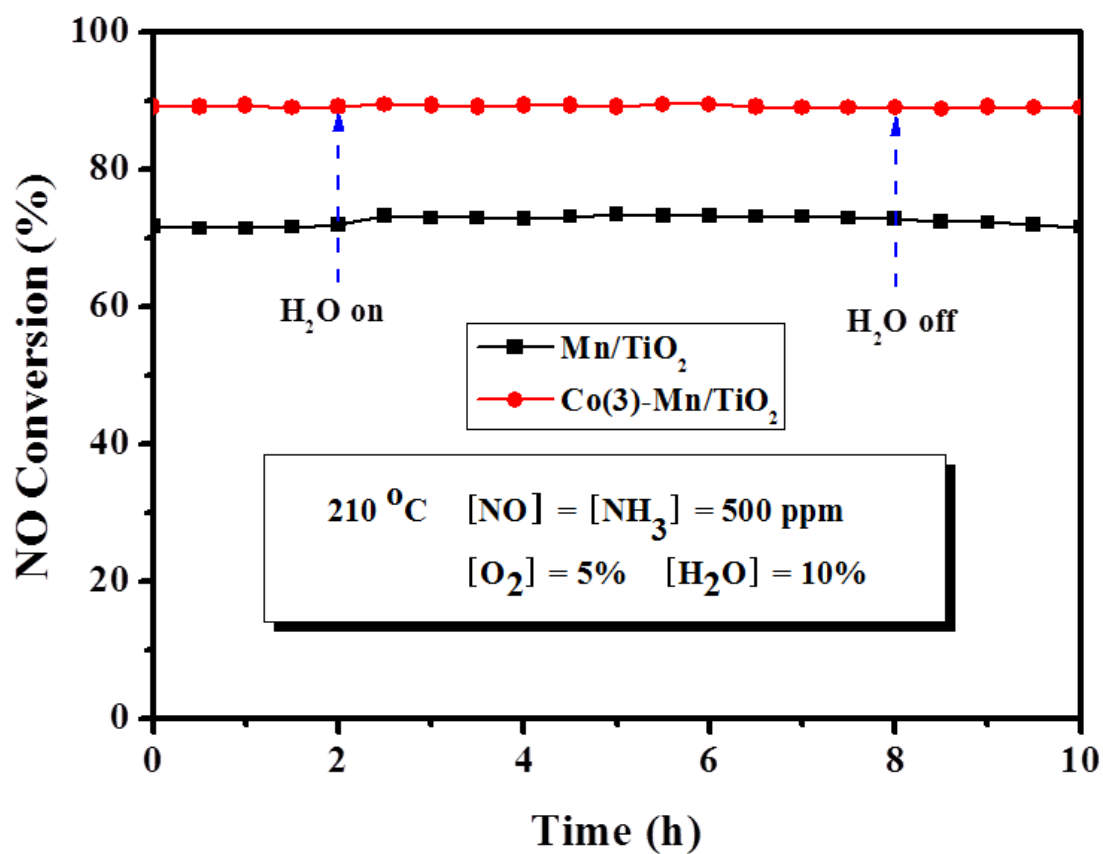

**Figure S11.** H<sub>2</sub>O tolerance tests of the catalysts at 210 °C. Reaction conditions: 500 ppm NO, 500 ppm NH<sub>3</sub>, 5 vol% O<sub>2</sub>, 10 vol% H<sub>2</sub>O (when used), N<sub>2</sub> as balance gas, total flow rate 270 mL/min and GHSV= 40 000 h<sup>-1</sup>.

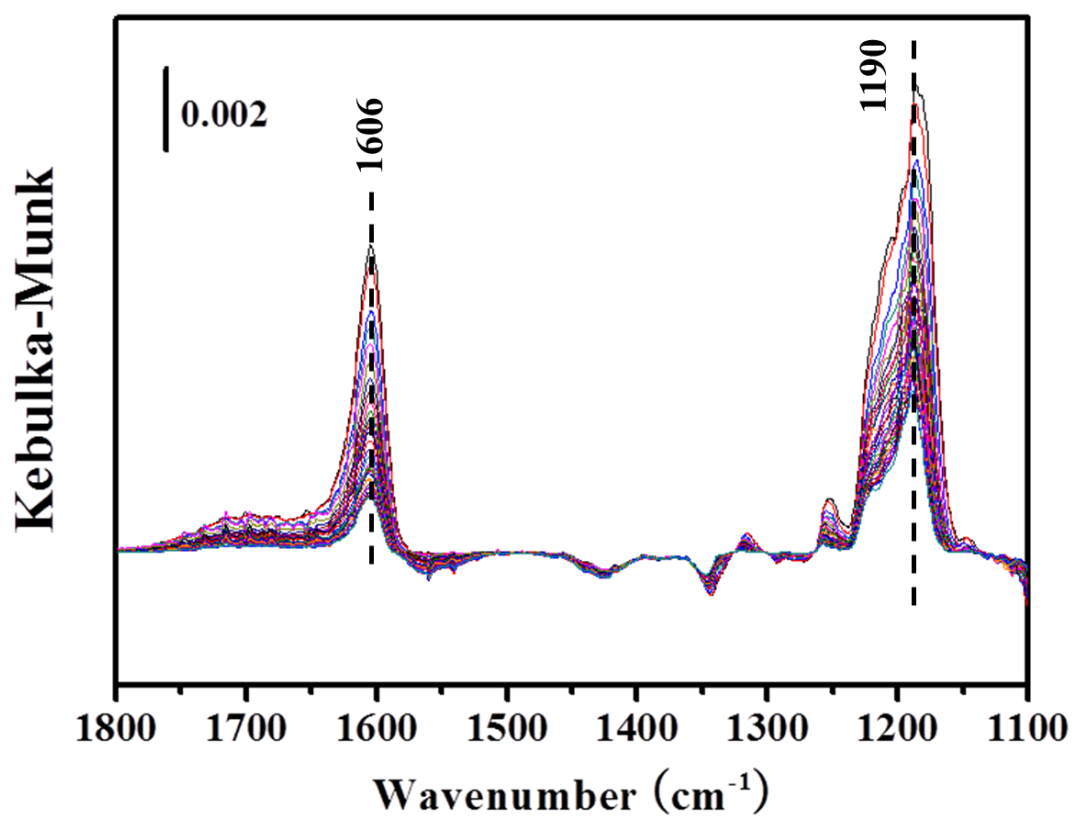

**Figure S12.** *In situ* DRIFT spectra of NH<sub>3</sub> desorption on the Mn/TiO<sub>2</sub> catalyst at 270 °C as a function of time at 1 min interval (30 min) after the catalysts were exposed to a flow of 500 ppm NH<sub>3</sub> for 60 min.

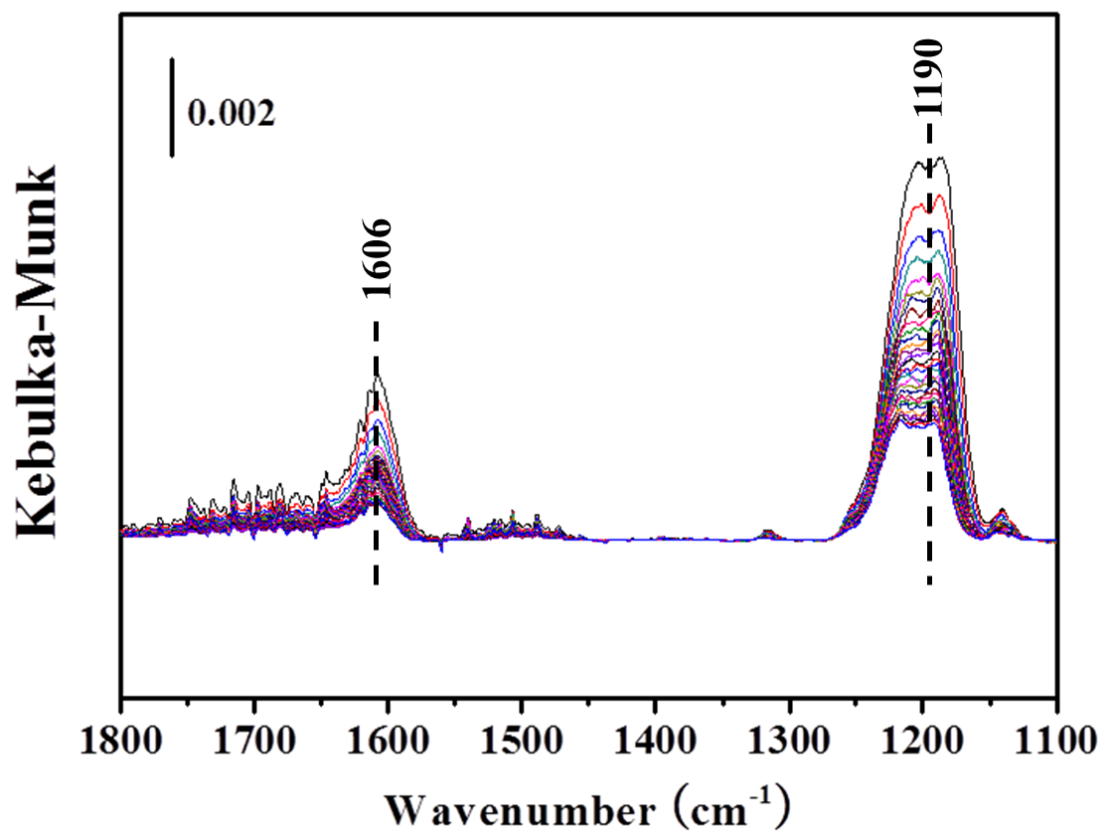

**Figure S13.** *In situ* DRIFT spectra of NH<sub>3</sub> desorption on the Co(3)-Mn/TiO<sub>2</sub> catalyst at 270 °C as a function of time at 1 min interval (30 min) after the catalysts were exposed to a flow of 500 ppm NH<sub>3</sub> for 60 min.

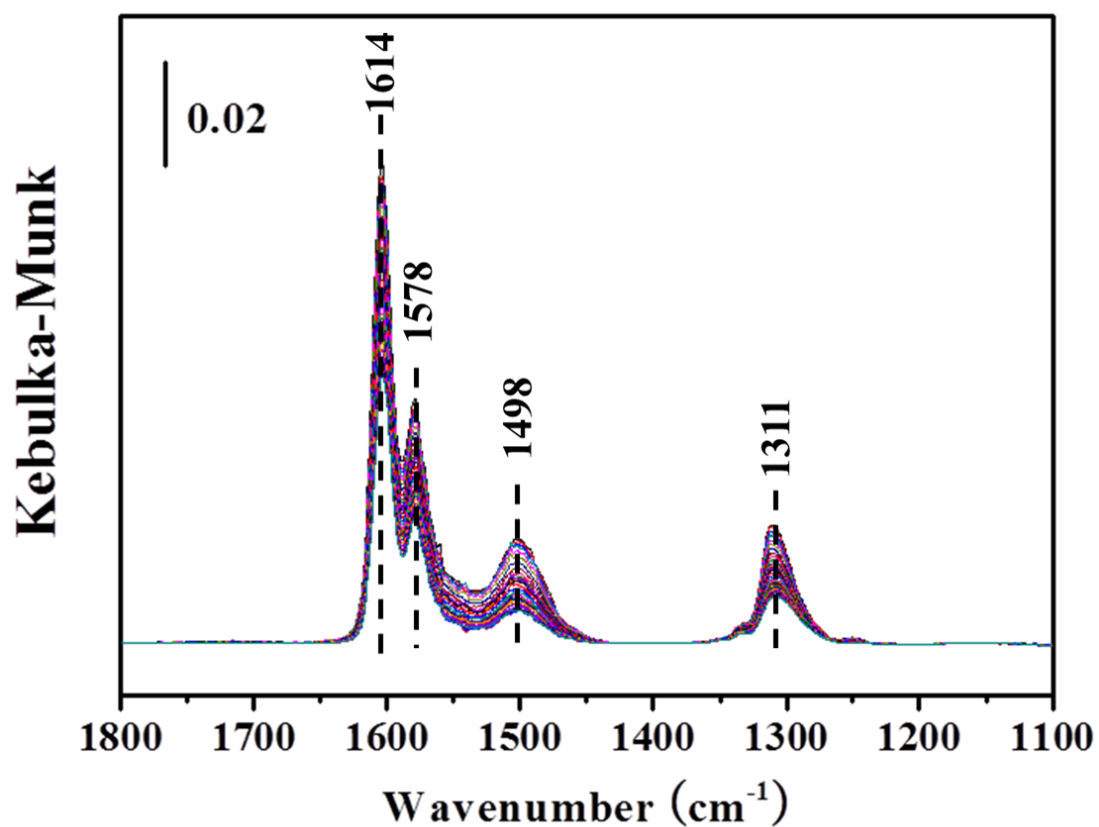

**Figure S14.** *In situ* DRIFT spectra of NO<sub>x</sub> desorption on the Mn/TiO<sub>2</sub> catalyst at 270 °C as a function of time at 1 min interval (30 min) after the catalysts were exposed to a flow of 500 ppm NO + 5% O<sub>2</sub> for 60 min.



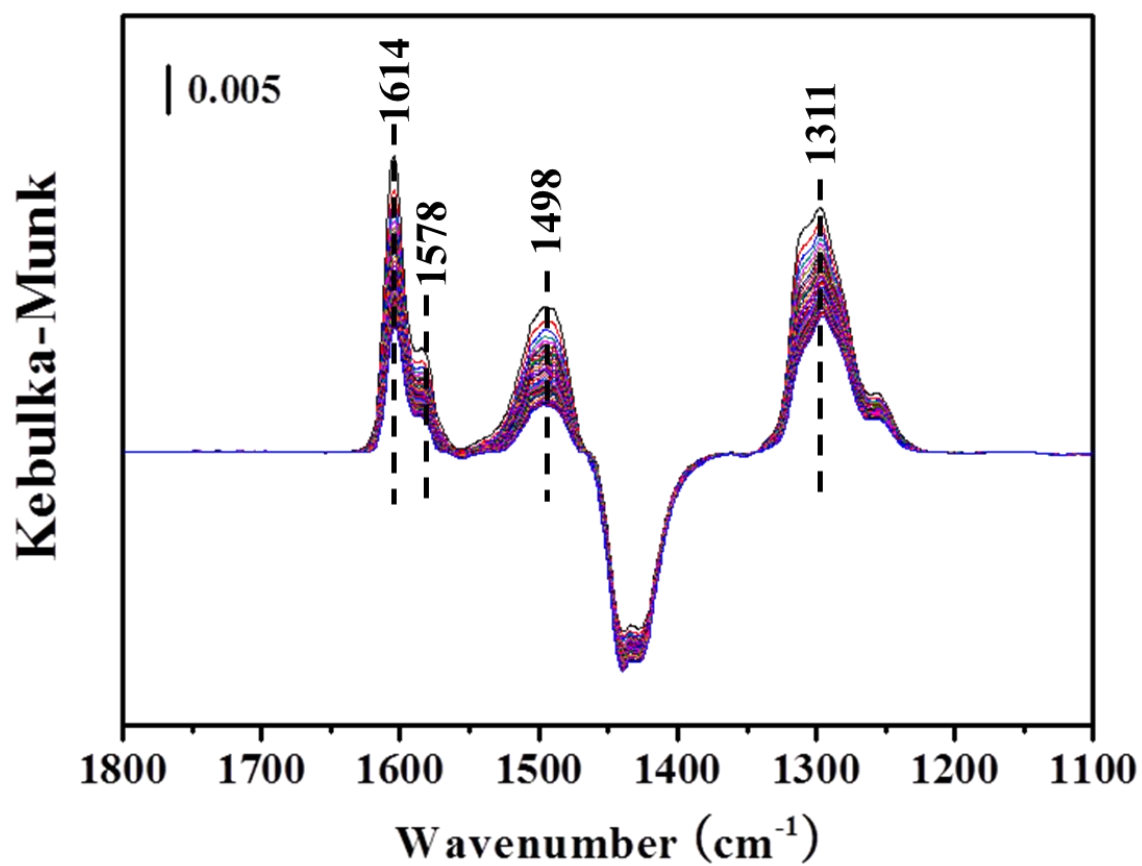

**Figure S15.** *In situ* DRIFT spectra of  $\text{NO}_x$  desorption on the  $\text{Co(3)-Mn/TiO}_2$  catalyst at 270  $^{\circ}\text{C}$  as a function of time at 1 min interval (30 min) after the catalysts were exposed to a flow of 500 ppm  $\text{NO}$  + 5%  $\text{O}_2$  for 60 min.

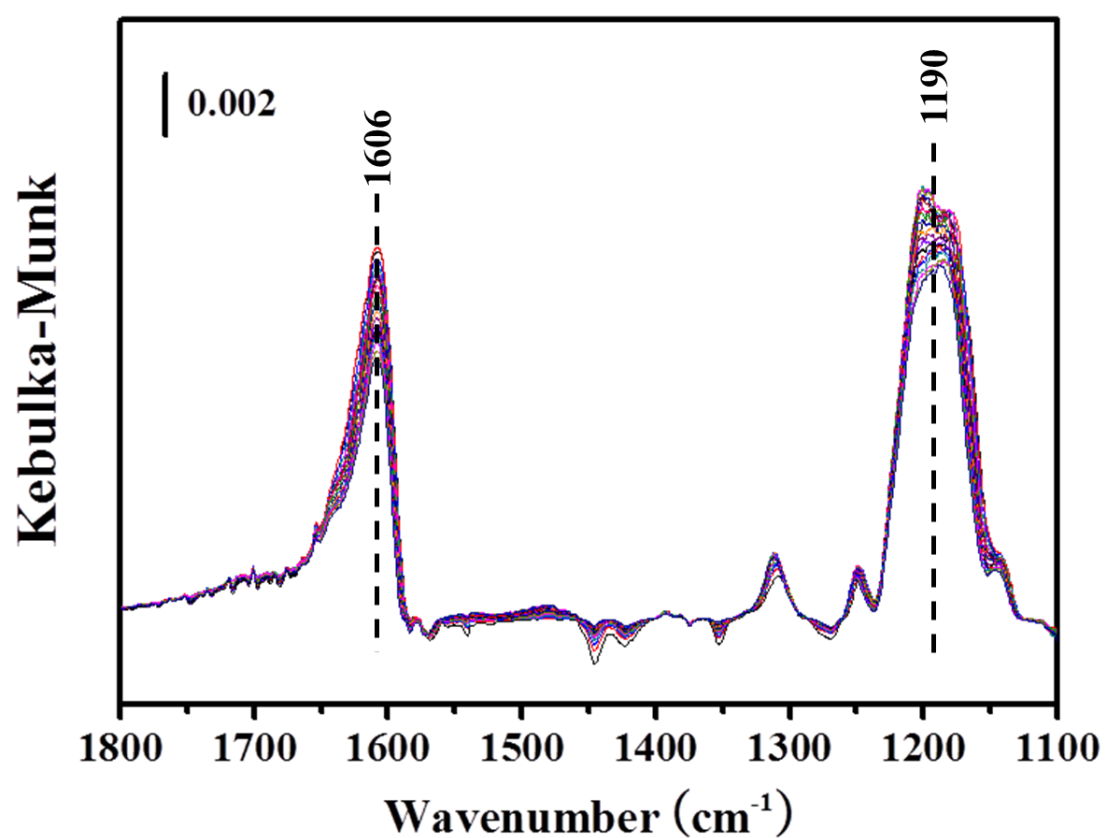

**Figure S16.** DRIFT spectra of transient reaction at 150 °C between NO+O<sub>2</sub> and preadsorbed NH<sub>3</sub> species over the Mn/TiO<sub>2</sub> catalyst recorded as a function of time (20 min).

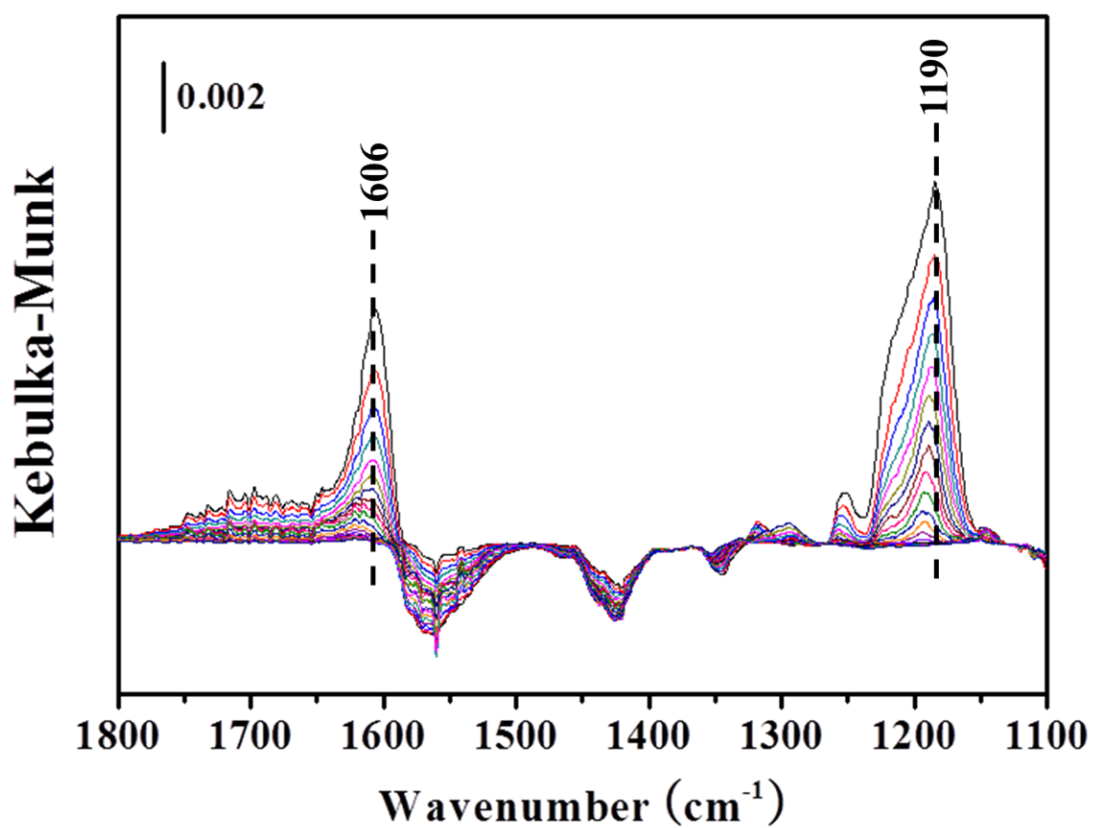

**Figure S17.** DRIFT spectra of transient reaction at 270 °C between NO+O<sub>2</sub> and preadsorbed NH<sub>3</sub> species over the Mn/TiO<sub>2</sub> catalyst recorded as a function of time (20 min).

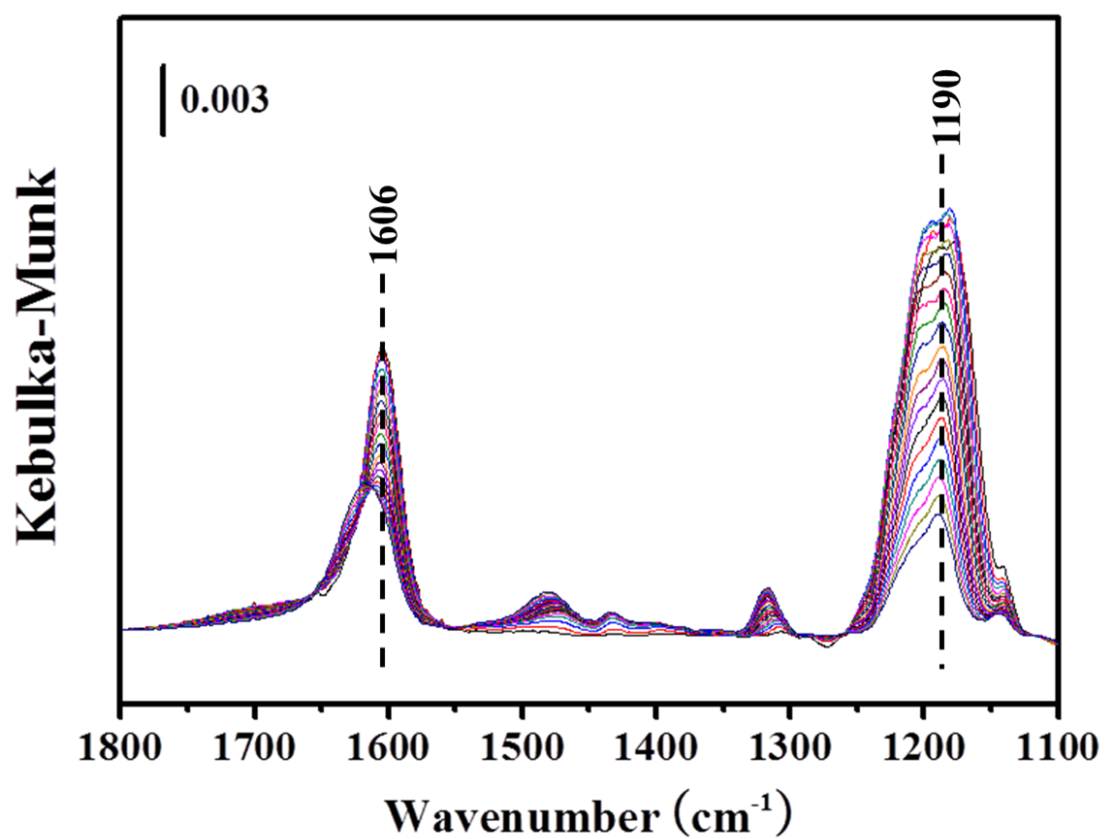

**Figure S18.** DRIFT spectra of transient reaction at 150 °C between NO+O<sub>2</sub> and preadsorbed NH<sub>3</sub> species over the Co(3)-Mn/TiO<sub>2</sub> catalyst recorded as a function of time (20 min).

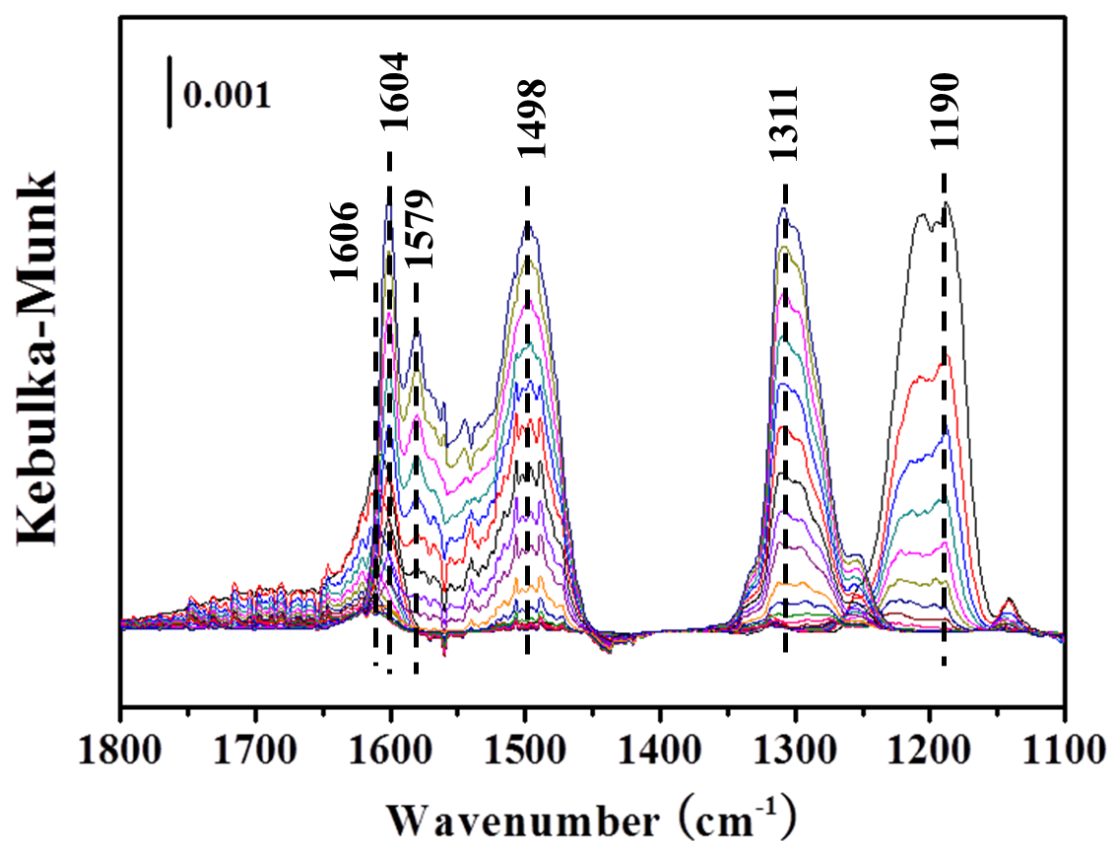

**Figure S19.** DRIFT spectra of transient reaction at 270 °C between  $\text{NO} + \text{O}_2$  and preadsorbed  $\text{NH}_3$  species over the  $\text{Co(3)-Mn/TiO}_2$  catalyst recorded as a function of time (20 min).

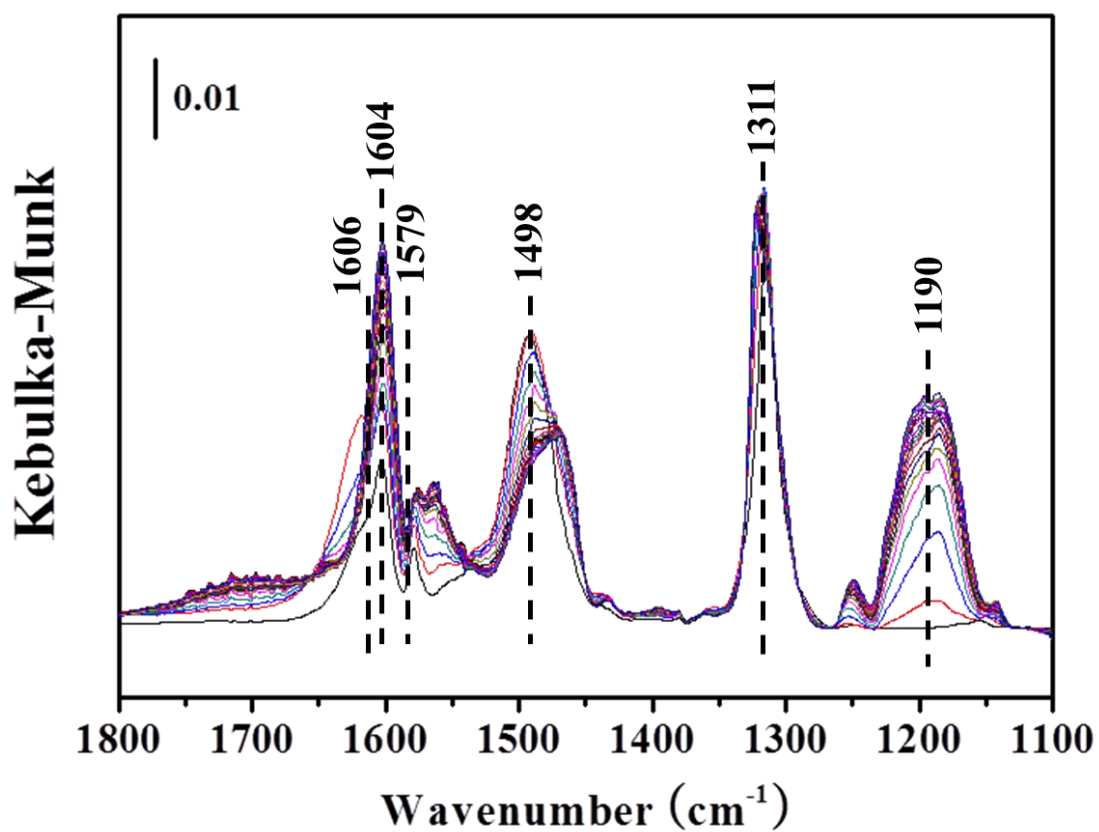

**Figure S20.** DRIFT spectra of transient reaction at 150 °C between NH<sub>3</sub> and preadsorbed NO+O<sub>2</sub> species over the Mn/TiO<sub>2</sub> catalyst recorded as a function of time (20 min).

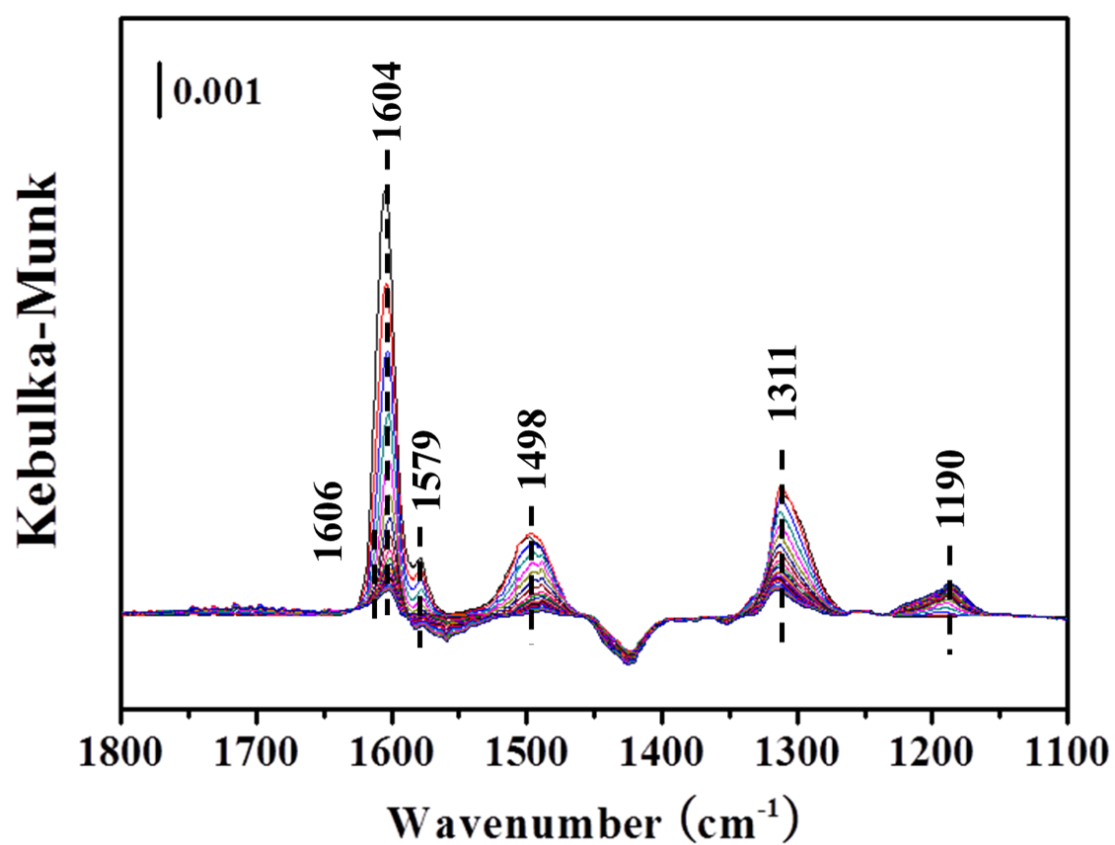

**Figure S21.** DRIFT spectra of transient reaction at 270 °C between NH<sub>3</sub> and preadsorbed NO+O<sub>2</sub> species over the Mn/TiO<sub>2</sub> catalyst recorded as a function of time (20 min).

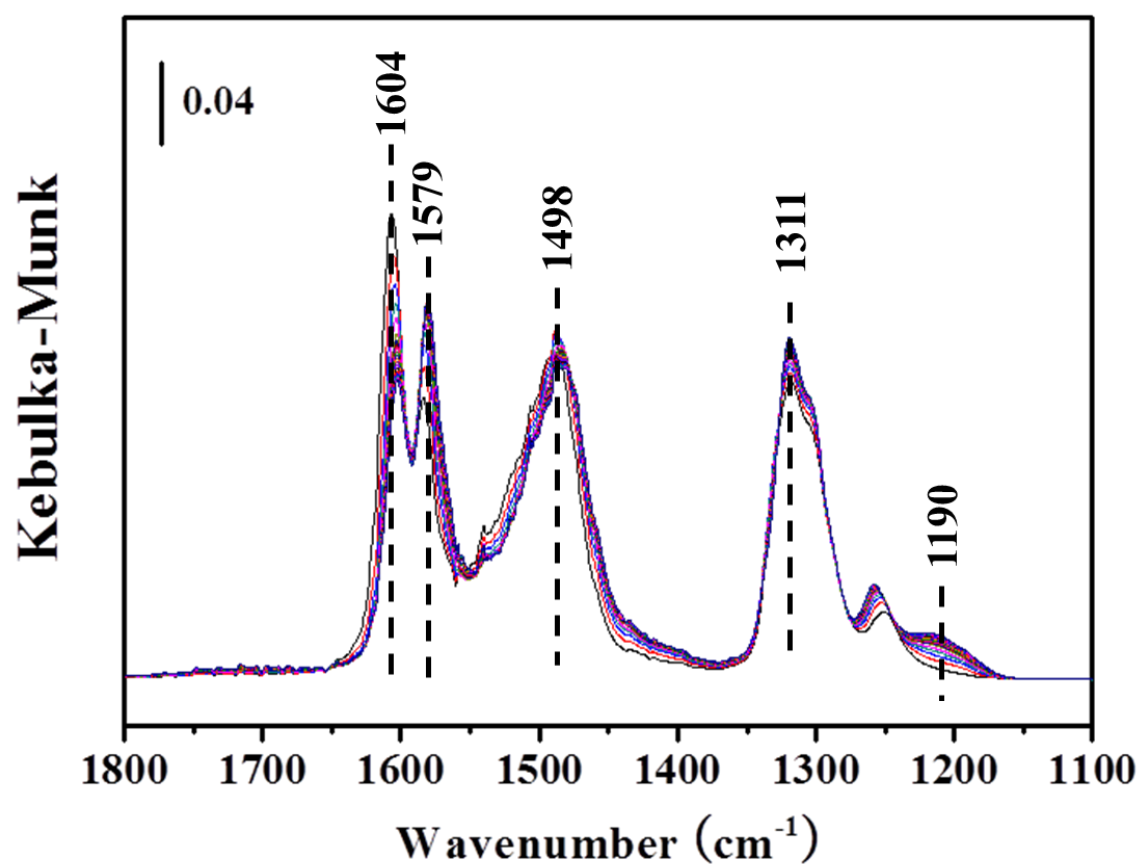

**Figure S22.** DRIFT spectra of transient reaction at 150 °C between NH<sub>3</sub> and preadsorbed NO+O<sub>2</sub> species over the Co(3)-Mn/TiO<sub>2</sub> catalyst recorded as a function of time (20 min).



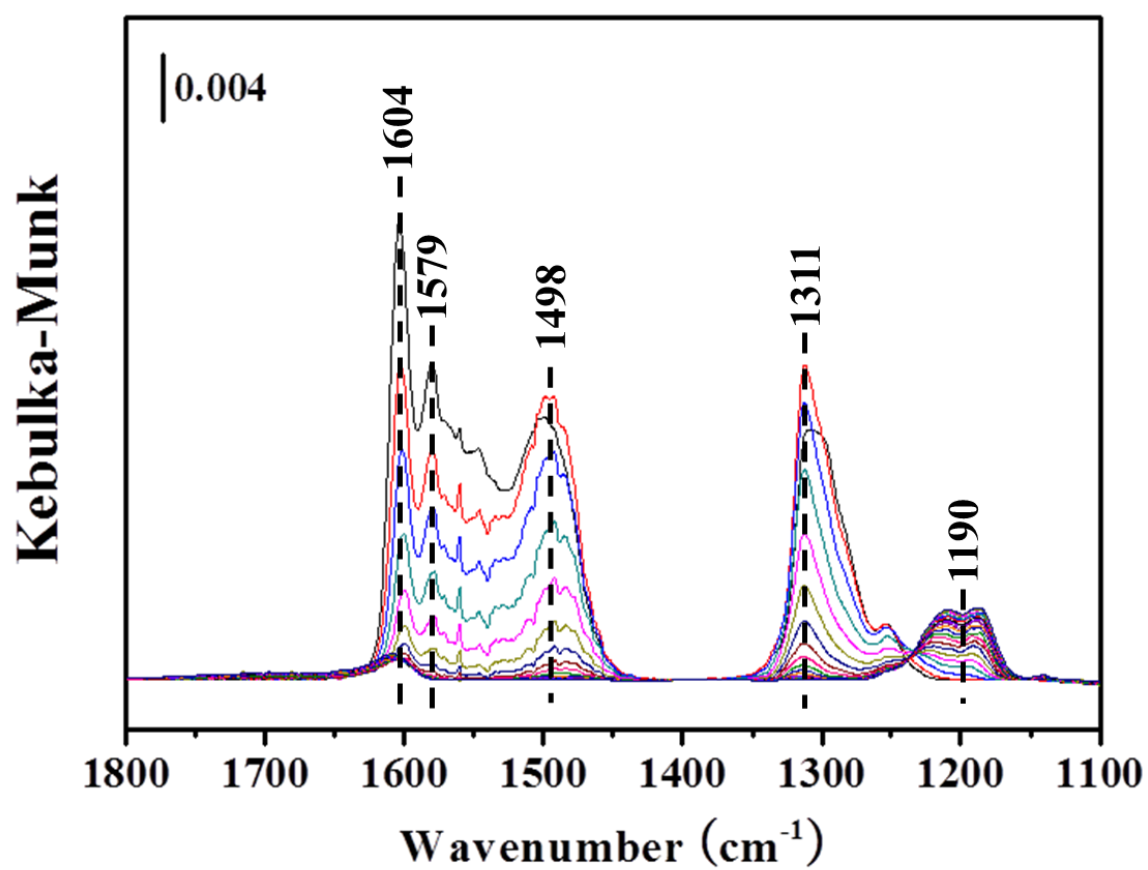

**Figure S23.** DRIFT spectra of transient reaction at 270 °C between NH<sub>3</sub> and preadsorbed NO+O<sub>2</sub> species over the Co(3)-Mn/TiO<sub>2</sub> catalyst recorded as a function of time (20 min).

**Table S2. Total Amount of Adsorbed NH<sub>3</sub> on the Catalysts**

| catalyst                  | Acidity <sup>a</sup> (μmol/g) |
|---------------------------|-------------------------------|
| Mn/TiO <sub>2</sub>       | 8.36                          |
| Co(1)-Mn/TiO <sub>2</sub> | 6.68                          |
| Co(2)-Mn/TiO <sub>2</sub> | 6.37                          |
| Co(3)-Mn/TiO <sub>2</sub> | 8.04                          |
| Co(4)-Mn/TiO <sub>2</sub> | 6.77                          |
| Co(6)-Mn/TiO <sub>2</sub> | 5.26                          |
| Co(8)-Mn/TiO <sub>2</sub> | 4.85                          |
| Co/TiO <sub>2</sub>       | 5.47                          |

<sup>a</sup>Calculated from the NH<sub>3</sub>-TPD results.
